# Supplementary figures and images for: Driving Factors of Chinese Pine Population Distribution in the Ridge Habitats of the Southern Slope of the Mid-Qinling Mountains, China
Source: MDPI journal article supplement (doi:10.3390/f14112252), 2023-11-16

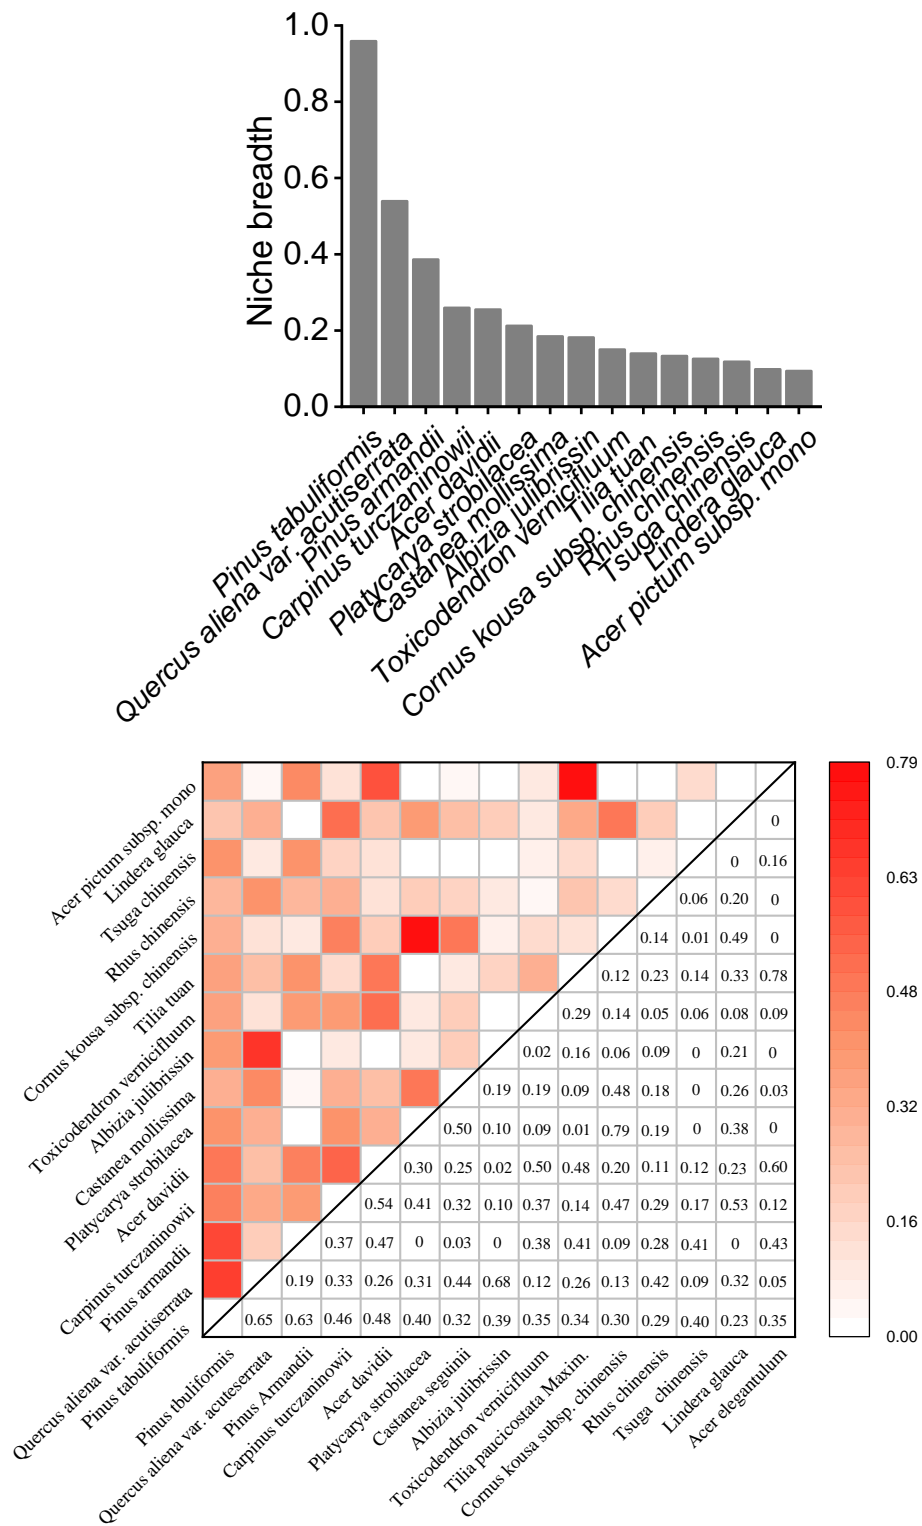

**Figure S1.** Main species Levins' niche breadth and niche overlap of *Pinus tabuliformis* community.

Supplement: s1 [file s1]
